# Supplementary material for: Memantine Monotherapy for Alzheimer’s Disease: A Systematic Review and Meta-Analysis
Source: PLOS journal article supplement (doi:10.1371/journal.pone.0123289), 2015-04-10
Supplement: S2 (10.1371/journal.pone.0123289.s002) [file journal.pone.0123289.s002]

# Supplementary appendix 1. Data synthesis.

Supplementary table 1 Data synthesis

|                            |                          | Reisberg 2003                | Peskind 2006                | van Dyck 2007               | Bakchine 2007               | Schmidt 2008 | Kitamura 2011               | Nakamura 2011               | Howard 2012              | Wang 2013            |
|----------------------------|--------------------------|------------------------------|-----------------------------|-----------------------------|-----------------------------|--------------|-----------------------------|-----------------------------|--------------------------|----------------------|
| Memantine<br>VS<br>Placebo | Cognitive function       | change scores of SIB         | change scores of ADAS-cog   | change scores of SIB        | change scores of ADAS-cog   |              | change scores of SIB        | change scores of SIB        | endpoint scores of SMMSE | change scores of SIB |
|                            | Behavioral disturbances  | change scores of NPI         | change scores of NPI        | change scores of NPI        | change scores of NPI        |              | change scores of NPI        | change scores of Behave-AD  | endpoint scores of NPI   | change scores of NPI |
|                            | Activity of daily living | change scores of ADCS-ADLsev | change scores of ADCS-ADL23 | change scores of ADCS-ADL19 | change scores of ADCS-ADL23 |              | change scores of ADCS-ADL19 |                             | endpoint scores of BADLS |                      |
|                            | Global assessment        | change scores of CIBIC-plus  | change scores of CIBIC-plus | change scores of CIBIC-plus | change scores of CIBIC-plus |              | change scores of CIBIC-plus | change scores of CIBIC-plus |                          |                      |
|                            | Stage of dementia        | change scores of FAST        |                             | change scores of FAST       |                             |              | change scores of FAST       | change scores of FAST       |                          |                      |

ADAS-cog: Alzheimer's Disease Assessment Scale cognitive subscale, ADCS-ADL (sev): Alzheimer's Disease Cooperative Study-Activities of Daily Living (modified for more severe dementia), Behave-AD: Behavioral Psychology in Alzheimer's Disease Rating Scale, CIBIC-Plus: Clinician's Interview-Based Impression of Change Plus Caregiver Input, FAST: Functional Assessment Staging instrument, NPI: neuro-psychiatric inventory, SIB: Severe Impairment Battery, SMMSE: Standardized Mini-Mental State Examination
